# Supplementary material for: Evidence of guest encapsulation within G8 and G10 dendrimers using NMR techniques
Source: Royal Society of Chemistry journal article supplement (doi:10.1039/c4sm01381f), 2014-09-22
Supplement: c4sm01381f1.pdf [file c4sm01381f1.pdf]

## Supporting Information

### Evidence of Guest Encapsulation within G8 and G10 Dendrimers using NMR Techniques

Naimin Shao<sup>1</sup>, Tianjiao Dai<sup>1</sup>, Yan Liu<sup>1</sup>, Lei Li<sup>1</sup>, Yiyun Cheng<sup>1,\*</sup>

<sup>1</sup>Shanghai Key Laboratory of Regulatory Biology, School of Life Sciences, East China Normal University, Shanghai, 200241, P.R. China. \*E-mail: [yycheng@mail.ustc.edu.cn](mailto:yycheng@mail.ustc.edu.cn)

<sup>2</sup>Shanghai Key Laboratory of Magnetic Resonance, East China Normal University, Shanghai, 200241, P.R. China

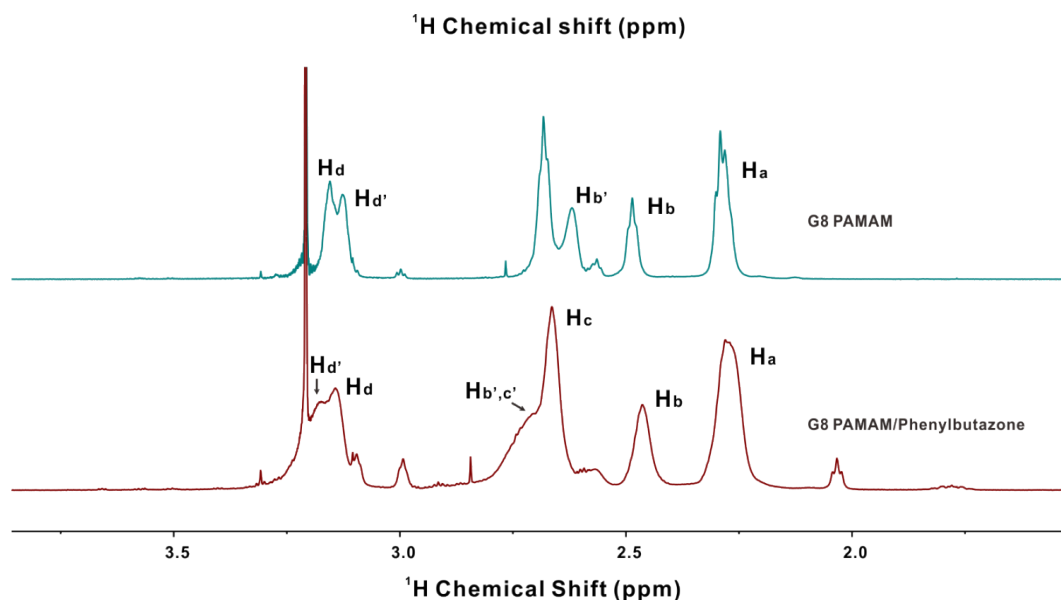

**Fig. S1.** <sup>1</sup>H NMR spectra of G8 PAMAM dendrimer and G8 PAMAM dendrimer/phenylbutazone complex in D<sub>2</sub>O. Downfield shifts of peaks (H<sub>b</sub>' and H<sub>d</sub>', located on the outmost layer of dendrimer) are observed in the <sup>1</sup>H NMR spectrum of G10 PAMAM dendrimer/phenylbutazone complex.

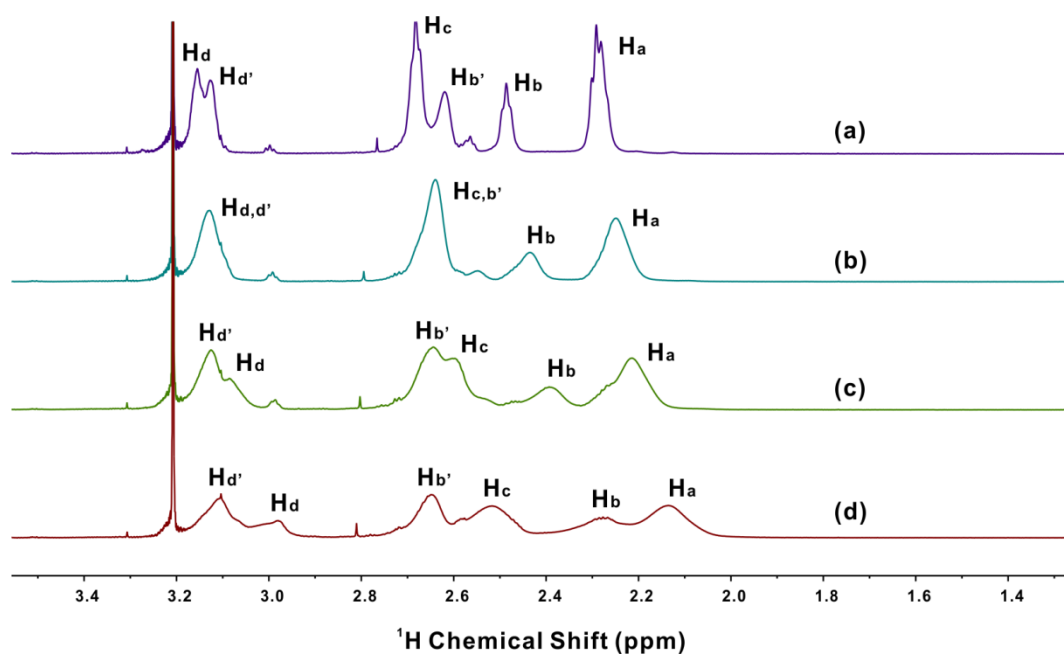

**Fig. S2.**  $^1\text{H}$  NMR spectra of G8 PAMAM dendrimer (a) and G8 PAMAM dendrimer/1-pyrenecarboxylic acid complexes (b-d) in  $\text{D}_2\text{O}$ . The molar ratios of 1-pyrenecarboxylic acid and G8 PAMAM dendrimer are 8:1 (b), 16:1 (c) and 32:1 (d), respectively.

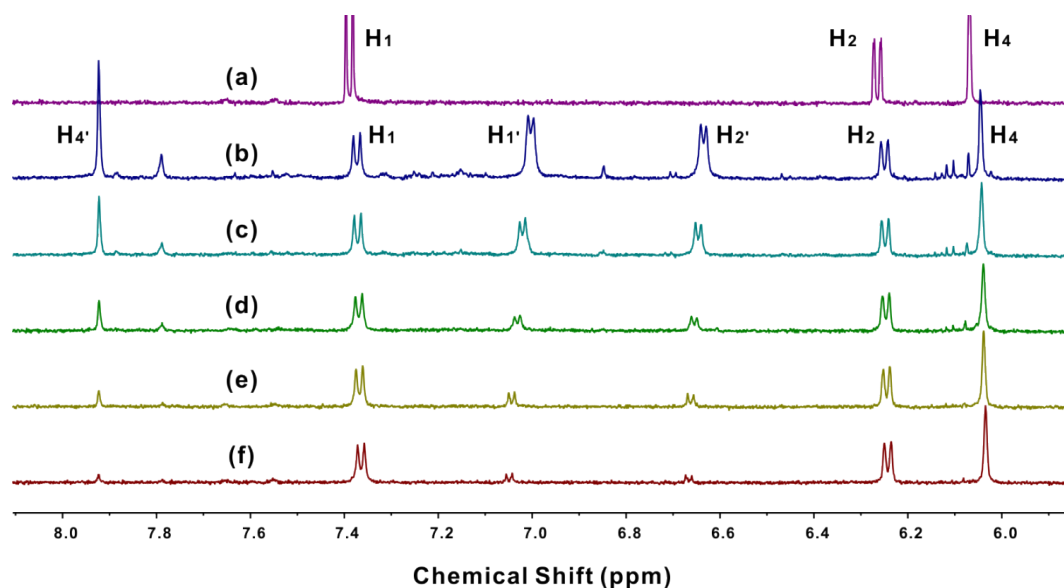

**Fig. S3.**  $^1\text{H}$  NMR spectra of dexamethasone sodium phosphate (a) and G8 PAMAM dendrimer/dexamethasone sodium phosphate complexes (b-f) in  $\text{D}_2\text{O}$ . The molar ratios of dexamethasone sodium phosphate and G8 PAMAM dendrimer are 1:1 (b), 2:1 (c), 4:1 (d), 8:1 (e) and 16:1 (f), respectively. The concentration of dexamethasone sodium phosphate in the samples is fixed at  $1.37 \times 10^{-4}$  M.

**Note:** As shown in Fig. S3, two groups of peaks are observed for protons  $\text{H}_1$ ,  $\text{H}_2$  and  $\text{H}_4$  on the dexamethasone sodium phosphate (one group for bound dexamethasone sodium phosphate and another group for free dexamethasone sodium phosphate). Since free- and bound-state dexamethasone sodium phosphate molecules are shown in different peaks, we can conclude that the dexamethasone sodium phosphate molecules in the complexes are in slow exchange between free- and bound-states.

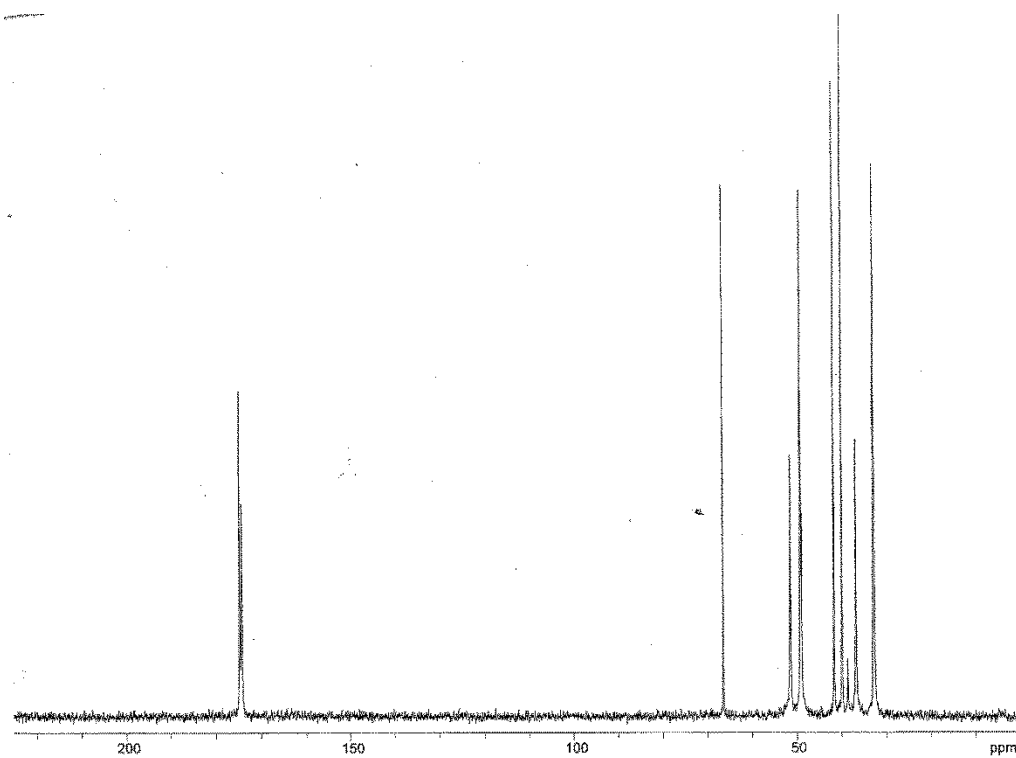

(a)

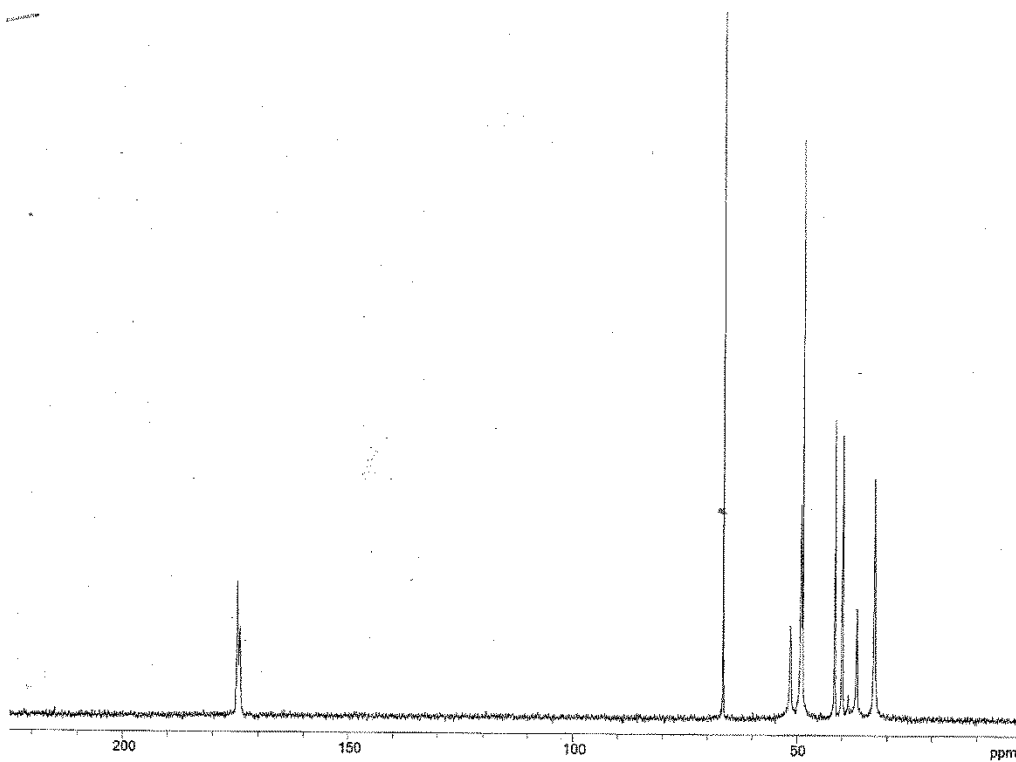

(b)

**Fig. S4.**  $^{13}\text{C}$  NMR analysis of G8 (a) and G10 (b) PAMAM dendrimers. The samples were measured in  $\text{D}_2\text{O}$  at 100 MHz.

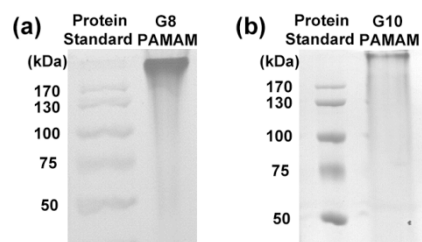

**Fig. S5.** Polyacrylamide gel electrophoresis analysis of G8 (a) and G10 (b) PAMAM dendrimers. The electrophoresis experiments were conducted according to a procedure described elsewhere. 8% polyacrylamide gels were used and the samples treated with 3% SDS were run at 120 V. The gels were stained with Coomassie Brilliant Blue solution, and destained with 10% methanol and 10% acetic acid in water.
